# Supplementary material for: Die Weiterbildungssituation in der HNO-Heilkunde in Deutschland
Source: Springer Nature journal article supplement (doi:10.1007/s00106-020-00838-9), 2020-03-04
Supplement: MOESM1 [file 17769922]

Tabelle 1: Ergebnisdarstellung einer Fragenauswahl gegliedert nach Themenkomplexen.

<sup>(1)</sup> Praxis n=0; andere n=1; <sup>(2)</sup> 1 - stimme zu bis 6 - stimme nicht zu

| Komplex                                                  | Frage                                                                                                                                               | gesamt  | Universitäts-<br>kliniken | städtische<br>Kliniken | Kliniken in privater<br>Trägerschaft | Kliniken in kirchlicher<br>Trägerschaft <sup>(1)</sup> |
|----------------------------------------------------------|-----------------------------------------------------------------------------------------------------------------------------------------------------|---------|---------------------------|------------------------|--------------------------------------|--------------------------------------------------------|
| Weiterbildungs-<br>stätte                                | Ich würde die Weiterbildungsstätte insgesamt weiterempfehlen.                                                                                       | n=222   | n=122                     | n=40                   | n=30                                 | n=24                                                   |
|                                                          | Ja                                                                                                                                                  | 80.2%   | 77.9%                     | 82.5%                  | 83.3%                                | 83.3%                                                  |
|                                                          | Nein                                                                                                                                                | 19.8%   | 22.1%                     | 17.5%                  | 16.7%                                | 1.7%                                                   |
|                                                          | Sehen Sie an Ihrer Weiterbildungsstätte eine berufliche Perspektive?                                                                                | n=221   | n=124                     | n=40                   | n=30                                 | n=26                                                   |
|                                                          | Ja                                                                                                                                                  | 28.1%   | 25.8%                     | 25%                    | 36.7%                                | 30.8%                                                  |
|                                                          | Ja, jedoch mit Einschränkungen.                                                                                                                     | 45.2%   | 50.8%                     | 40%                    | 33.3%                                | 42.3%                                                  |
|                                                          | Eher nicht.                                                                                                                                         | 21.7%   | 19.4%                     | 27.5%                  | 20%                                  | 26.9%                                                  |
|                                                          | Auf keinen Fall.                                                                                                                                    | 5%      | 4%                        | 7.5%                   | 10%                                  | 0%                                                     |
|                                                          | Die Verlängerung meines Vertrages ...                                                                                                               | n=209   | n=122                     | n=35                   | n=30                                 | n=26                                                   |
|                                                          | erfolgt in regelmäßigen Abständen.                                                                                                                  | 28.7%   | 31.1%                     | 5.7%                   | 36%                                  | 42.3%                                                  |
|                                                          | erfolgt in unregelmäßigen Abständen.                                                                                                                | 12.4%   | 16.4%                     | 11.4%                  | 4%                                   | 3.8%                                                   |
|                                                          | ist ungewiß.                                                                                                                                        | 58.9%   | 52.5%                     | 82.9%                  | 60%                                  | 53.8%                                                  |
| Vermittlung von<br>Fachkompetenz                         | Wer betreut in erster Linie Ihre praktische Weiterbildung?                                                                                          | n=223   | n=125                     | n=41                   | n=30                                 | n=26                                                   |
|                                                          | Chefarzt                                                                                                                                            | 22%     | 8%                        | 31.7%                  | 66.7%                                | 23.2%                                                  |
|                                                          | Oberarzt                                                                                                                                            | 86.5%   | 83.2%                     | 90.2%                  | 96.7%                                | 84.6%                                                  |
|                                                          | Facharzt                                                                                                                                            | 52.5%   | 56.8%                     | 36.6%                  | 56.7%                                | 50%                                                    |
|                                                          | älterer Assistenzarzt                                                                                                                               | 37.7%   | 48%                       | 29.3%                  | 16.7%                                | 26.9%                                                  |
|                                                          | anderer                                                                                                                                             | 0.9%    | 1.6%                      | 0%                     | 0%                                   | 0%                                                     |
|                                                          | keiner                                                                                                                                              | 11.7%   | 12.8%                     | 17.1%                  | 0%                                   | 11.5%                                                  |
|                                                          | Wie groß ist der Beitrag der Weiterbildungsstätte zur Entwicklung der folgenden Kenntnisse und Fertigkeiten?                                        | n=222   | n=124                     | n=41                   | n=30                                 | n=26                                                   |
|                                                          | Erlernen von Anamneseerhebung / Patientenkommunikation                                                                                              | 3.1±1.6 | 3.4±1.6                   | 3.1±1.6                | 2.2±1.0                              | 3.2±1.6                                                |
|                                                          | Erlernen von Untersuchungstechniken / Befundauswertung                                                                                              | 3.0±1.4 | 3.2±1.2                   | 3.0±1.2                | 3.0±1.0                              | 3.0±1.4                                                |
|                                                          | Erwerb von theoretischen fachspezifischen Kenntnissen                                                                                               | 3.2±1.3 | 3.2±1.3                   | 3.6±1.3                | 2.8±1.4                              | 3.2±1.3                                                |
|                                                          | Erlernen von OP-Techniken                                                                                                                           | 2.9±1.5 | 3.1±1.4                   | 3.1±1.8                | 2.1±1.1                              | 2.6±1.1                                                |
| Anleitung zum wissenschaftlichen Arbeiten                | 4.2±1.5                                                                                                                                             | 3.8±1.5 | 4.6±1.3                   | 4.3±1.6                | 5.0±1.1                              |                                                        |
| selbstständiges Arbeiten / Übertragung von Verantwortung | 2.2±1.2                                                                                                                                             | 2.4±1.4 | 2.2±1.2                   | 2.0±0.8                | 1.9±1.0                              |                                                        |
| Lernkultur                                               | Mein(e) Weiterbildungsbeauftragte(r) (WBB) nimmt/nehmen sich Zeit, um mir Zusammenhänge zu erklären und meine Fragen zu beantworten. <sup>(2)</sup> | n=221   | n=124                     | n=41                   | n=30                                 | n=25                                                   |
|                                                          |                                                                                                                                                     | 3.3±1.6 | 3.5±1.5                   | 3.4±1.8                | 2.4±1.4                              | 2.8±1.6                                                |
|                                                          | Ich erhalte regelmäßig Feedback über meine Tätigkeit. <sup>(2)</sup>                                                                                | n=220   | n=122                     | n=41                   | n=30                                 | n=26                                                   |
|                                                          |                                                                                                                                                     | 4±1.5   | 4.3±1.4                   | 4±1.6                  | 3±1.5                                | 3.7±1.3                                                |
|                                                          | An meiner Weiterbildungsstätte ist es ein wichtiges Ziel eine gute Weiterbildung zu bieten. <sup>(2)</sup>                                          | n=222   | n=124                     | n=41                   | n=30                                 | n=26                                                   |
|                                                          | 3.3±1.6                                                                                                                                             | 3.6±1.6 | 3.4±1.7                   | 2.5±1.6                | 3.1±1.4                              |                                                        |

|                                                               |                                                                                                                                                                                                                             |         |         |         |         |         |
|---------------------------------------------------------------|-----------------------------------------------------------------------------------------------------------------------------------------------------------------------------------------------------------------------------|---------|---------|---------|---------|---------|
| <b>Arbeitssituation</b>                                       | Ich bin insgesamt zufrieden mit der jetzigen Arbeitsbelastung. <sup>(2)</sup>                                                                                                                                               | n=222   | n=124   | n=41    | n=30    | n=26    |
|                                                               |                                                                                                                                                                                                                             | 3.4±1.6 | 3.4±1.6 | 3.6±1.7 | 2.8±1.6 | 3.2±1.2 |
|                                                               | In meiner vertraglich geregelten Arbeitszeit kann ich in der Regel die Arbeit zu meiner Zufriedenheit erfüllen. <sup>(2)</sup>                                                                                              | n=222   | n=124   | n=41    | n=30    | n=26    |
|                                                               |                                                                                                                                                                                                                             | 3.8±1.7 | 4.1±1.7 | 3.6±1.7 | 2.6±1.3 | 3.7±1.5 |
|                                                               | In meiner vertraglich geregelten Arbeitszeit kann ich die Weiterbildung weitgehend erfüllen. <sup>(2)</sup>                                                                                                                 | n=222   | n=124   | n=41    | n=30    | n=26    |
|                                                               | 3.7±1.6                                                                                                                                                                                                                     | 4±1.6   | 3.7±1.7 | 2.9±1.4 | 3.3±1.4 |         |
| <b>Führungs- und Betriebskultur</b>                           | Ich bin insgesamt zufrieden mit dem jetzigen Arbeitsklima. <sup>(2)</sup>                                                                                                                                                   | n=218   | n=122   | n=41    | n=28    | n=26    |
|                                                               |                                                                                                                                                                                                                             | 2.7±1.4 | 2.8±1.4 | 2.7±1.4 | 2.5±1.5 | 2.3±1   |
|                                                               | Kritik an meiner Arbeitstätigkeit wird angemessen formuliert. <sup>(2)</sup>                                                                                                                                                | n=222   | n=124   | n=41    | n=30    | n=26    |
|                                                               | 3±1.5                                                                                                                                                                                                                       | 3.3±1.4 | 2.9±1.6 | 2.4±1.3 | 2.8±1.7 |         |
| <b>Ausbildungsstruktur</b>                                    | Ich bin insgesamt zufrieden mit der jetzigen Weiterbildung. <sup>(2)</sup>                                                                                                                                                  | n=222   | n=124   | n=41    | n=30    | n=26    |
|                                                               |                                                                                                                                                                                                                             | 3±1.5   | 3.2±1.4 | 3.1±1.6 | 2.5±1.3 | 2.6±1.2 |
|                                                               | Das durch die Weiterbildungsordnung festgelegte Gespräch mit dem Weiterbildungsbeauftragten findet statt.                                                                                                                   | n=221   | n=123   | n=41    | n=30    | n=26    |
|                                                               | regelmäßig (jährlich)                                                                                                                                                                                                       | 44.8%   | 44.7%   | 34.1%   | 60%     | 42.3%   |
|                                                               | teilweise                                                                                                                                                                                                                   | 28.5%   | 22.8%   | 36.6%   | 26.7%   | 46.2%   |
|                                                               | nie                                                                                                                                                                                                                         | 26.7%   | 32.5%   | 29.3%   | 13.3%   | 11.5%   |
|                                                               | Die in der Weiterbildungsordnung festgelegten Ziele werden in der Regelweiterbildungszeit erreicht.                                                                                                                         | n=213   | n=118   | n=41    | n=28    | n=25    |
|                                                               | vollständig                                                                                                                                                                                                                 | 34.3%   | 33.9%   | 24.4%   | 50%     | 32%     |
|                                                               | teilweise                                                                                                                                                                                                                   | 49.8%   | 49.2%   | 51.2%   | 42.9%   | 60%     |
|                                                               | ungenügend                                                                                                                                                                                                                  | 16%     | 16.9%   | 24.4%   | 7.1%    | 8%      |
|                                                               | Erfolgt Ihre Ausbildung nach einem LogBuch?                                                                                                                                                                                 | n=217   | n=121   | n=40    | n=30    | n=25    |
|                                                               | Ja, nach einem klinikinternen LogBuch.                                                                                                                                                                                      | 17.1%   | 17.4%   | 12.5%   | 13.3%   | 28%     |
|                                                               | Ja, nach einem LogBuch der europäischen Facharztweiterbildung.                                                                                                                                                              | 25.3%   | 28.9%   | 15%     | 26.7%   | 24%     |
|                                                               | Ja, nach einem anderen LogBuch.                                                                                                                                                                                             | 6.9%    | 5%      | 0%      | 26.7%   | 0%      |
|                                                               | Nein.                                                                                                                                                                                                                       | 50.7%   | 48.8%   | 72.5%   | 33.3%   | 48%     |
|                                                               | Mir wurde ein strukturierter Weiterbildungsplan zur Kenntnis gegeben.                                                                                                                                                       | n=217   | n=124   | n=39    | n=29    | n=24    |
|                                                               | Ja.                                                                                                                                                                                                                         | 21.2%   | 17.7%   | 20.5%   | 34.5%   | 20.8%   |
| Nein.                                                         | 78.8%                                                                                                                                                                                                                       | 82.3%   | 79.5%   | 65.5%   | 79.2%   |         |
| Wie oft besuchen Sie Fort- und Weiterbildungsveranstaltungen? | n=220                                                                                                                                                                                                                       | n=123   | n=41    | n=30    | n=25    |         |
| wöchentlich                                                   | 25.5%                                                                                                                                                                                                                       | 35%     | 12.2%   | 16.7%   | 12%     |         |
| mind. 1x im Monat                                             | 23.6%                                                                                                                                                                                                                       | 26.8%   | 17.1%   | 20%     | 24%     |         |
| ca. halbjährlich                                              | 37.7%                                                                                                                                                                                                                       | 26.8%   | 56.1%   | 50%     | 44%     |         |
| 1x im Jahr                                                    | 12.7%                                                                                                                                                                                                                       | 10.6%   | 14.6%   | 13.3%   | 20%     |         |
| seltener                                                      | 0.5%                                                                                                                                                                                                                        | 0.8%    | 0%      | 0%      | 0%      |         |
| <b>Eigenaktivität</b>                                         | Besteht die Möglichkeit zur Hospitation an anderen Weiterbildungsstätten, um hauseigen nicht vorgehaltene, in der Weiterbildungsordnung festgehaltene festgelegte Ziele ( bspw. Allergologie, Phoniatrie etc.) zu erlernen? | n=217   | n=122   | n=39    | n=29    | n=26    |
|                                                               | Ja, problemlos.                                                                                                                                                                                                             | 9.2%    | 9.8%    | 7.7%    | 10.3%   | 3.8%    |
|                                                               | Ja, auf Eigeninitiative hin.                                                                                                                                                                                                | 45.2%   | 45.9%   | 48.7%   | 48.3%   | 34.6%   |
|                                                               | Nein.                                                                                                                                                                                                                       | 45.6%   | 44.3%   | 43.6%   | 41.4%   | 61.5%   |
